# Supplementary material for: A microbiological system for screening the interference of XNA monomers with DNA and RNA metabolism
Source: Royal Society of Chemistry journal article supplement (doi:10.1039/d3ra06172h), 2023-01-01
Supplement: d3ra06172h1.pdf [file d3ra06172h1.pdf]

## Supplementary informations

### A microbiological system for screening the interference of XNA monomers with DNA and RNA metabolism

Aude Blanchard<sup>a</sup>, Mikhail Abramov<sup>b</sup>, Camille Hassan<sup>a</sup>, Philippe Marlière<sup>c</sup>, Piet Herdewijn<sup>b</sup> and Valérie Pezo<sup>a\*</sup>

#### Material

##### Chemical synthesis of ribo- and deoxynucleoside triphosphate analogues

The synthesis of the libraries of hexitol TPs<sup>1,2</sup>, cyclohexenyl TPs<sup>3-5</sup>, araTPs<sup>3,6</sup>, morpholino TPs<sup>7</sup>, altritol TPs<sup>8</sup>, pyrimidine and purine base modified deoxyribo TPs<sup>9-11</sup> was carried out using the Ludwig method<sup>12</sup> with a few modifications, as described below. For the synthesis of P- $\alpha$ -methyl-h-HxTP we used methylphosphonic dichloride as the phosphitylating reagent. Dideoxycytidine triphosphate (ddCTP) was obtained from Trilink, 5-fluoro dCTP, 5-BrdCTP and 5-Me dCTP were obtained from Jena Bioscience. dZTP was synthesized as previously described<sup>13</sup> and obtained from Trilink for replicate.

#### Methods

##### General procedure for synthesis of nucleoside triphosphates

To an ice-cold solution or suspension of corresponding nucleoside (0.1 mmol) in trimethyl phosphate (TMP) (1.0 mL) was added phosphoryl oxychloride (20  $\mu$ L, 0.22 mmol) or methylphosphonyl dichloride (30  $\mu$ L, 0.25 mmol) and the solution was stirred at 0°C for 5 hours. Tributylamine (300  $\mu$ L, 1.6 mmol) and tetrabutylammonium pyrophosphate solution (0.5 M in DMF, 1.1 mmol) were added simultaneously, and the solution was stirred for a further 30 minutes. The reaction was then quenched by the addition of 0.5 M triethylammonium bicarbonate (TEAB) buffer (10 mL), and stored at 4°C overnight. The solvent was evaporated and the residue was treated with 25% ammonia (4 mL). The solution was evaporated to dryness and re-dissolved in water (5 mL) and applied to a Sephadex A25 column in 0.1 M TEAB buffer. The column was eluted with a linear gradient of 0.1-1.0 M TEAB. Appropriate fractions were pooled and evaporated to dryness to give desired product. HPLC (Alltima 5  $\mu$  C-18 reverse phase column 10x250 mm, buffer A, 0.1 M TEAB; buffer B, 0.1 M TEAB, 25% MeCN. 0% to 100% buffer B over 60 minutes at 3 mL/min.) showed the product to be pure.

1',5'-Anhydro-2',3'-dideoxy-2'-(hypoxanthin-9-yl)-D-*arabino*-hexitol 6'-triphosphate (1A3) was prepared from corresponding nucleoside<sup>14</sup>. <sup>31</sup>P NMR (D<sub>2</sub>O):  $\delta$  -7.89 (1P, d), -10.66 (1P,d), -22.33 (1P,t). ESIHRMS found: m/z 504.9944. calcd for C<sub>11</sub>H<sub>17</sub>N<sub>4</sub>O<sub>13</sub>P<sub>3</sub>: (M-H)– 504.9932.

4(R)-Hydroxy-2(S)-oxymethyl-N-(adenin-9-yl)acetyl-pyrrolidine triphosphate (1F1) was prepared from corresponding nucleoside<sup>15</sup>. <sup>31</sup>P NMR (D<sub>2</sub>O): δ -10.72 (2P, m), -23.41 (1P,t). ESIHRMS found: m/z 531.0205. calcd for C<sub>10</sub>H<sub>15</sub>N<sub>4</sub>O<sub>14</sub>P<sub>3</sub>: (M-H)<sup>-</sup> 531.0196.

1',5'-Anhydro-2',3'-dideoxy-2'-(guanin-9-yl)-D-arabino-hexitol 6'-(α-methylphosphonyl)diphosphate (1F4) was prepared from corresponding nucleoside [1,2] as a racemic mix of (R)<sub>p</sub> and (S)<sub>p</sub> diastereoisomers. <sup>31</sup>P NMR (D<sub>2</sub>O): δ 27.85 (1P, m), -6.11 (1P,d), -22.90 (1P,t). ESIHRMS found: m/z 518.0245. calcd for C<sub>12</sub>H<sub>20</sub>N<sub>5</sub>O<sub>12</sub>P<sub>3</sub>: (M-H)<sup>-</sup> 518.0248.

## Bacterial Strains and Growth Conditions

All strains used in this study are derived from the wild-type *Escherichia coli* K12 strain MG1655 and cultured in LB medium. The detailed procedure for the construction of the XE763 and XE858 with their respective genotype Δtdk ΔphoA ΔompT::aac and Δtdk ΔphoA ∇ompT::aad ntt2:M46V, has been previously reported<sup>16</sup>.

## Inhibition Assays on Plates

For testing the toxicity of the nucleosides triphosphates molecules *in vivo*, the *E. coli* XE858 strain was cultivated overnight in LB medium in the presence of spectinomycin, then diluted to an OD of 0.04 in 5 mL of fresh medium and spread on MH agar plates supplemented with phosphates (KPi 10mM). After 30 minutes, the excess liquid (around 4 ml) was removed by pipetting, tilting the dish slightly, a central well was dug and 35 μl of 100 mM of the compound to be tested were placed in the central well. ddCTP, 5-Aza-dCTP and 5-Br-dCTP were used at a concentration of 10 mM. Plates were incubated overnight at 30°C.

## Mutagenic effect

An overnight culture of XE858 in MH spectinomycin was diluted 1:100 in the same fresh medium containing 30, 100 or 300 μM of the nucleoside triphosphate and incubated for 16 hours at 37°C before plating. Viable cell counts (cfu) were done on LB plates after serial dilutions. Rifampicin-resistant clones were selected on LB agar supplemented with 50 mg/L rifampicin. The mutation frequency was calculated as the number of mutant cells divided by the total number of viable cells. The controls without nucleoside triphosphate (negative control) and in the presence of 5Aza dCTP (positive control) were carried out for each series of tests. The number of clones obtained on Rifampicin was between 1 and 12 clones without nucleoside triphosphate and between 122 and 350 clones for 5 Aza dCTP giving an average mutation frequency of  $2.5 \cdot 10^{-8}$  (standard deviation : +/-  $2,2 \cdot 10^{-8}$ ) and  $3.8 \cdot 10^{-6}$  (standard deviation : +/-  $2,8 \cdot 10^{-6}$ ) respectively. Experiments were done twice when possible due to compounds availability and the corresponding uncorrected standard deviation was calculated.

| Compound         | Concentration (μM) | Mutation frequency | Mutation frequency | Average | Standard deviation (uncorrected) |
|------------------|--------------------|--------------------|--------------------|---------|----------------------------------|
| h-TTP            | 30                 | 1,3E-08            | 2,9E-09            | 8,0E-09 | 5,1E-09                          |
|                  | 100                | 0,0E+00            | 5,3E-09            | 2,7E-09 | 2,7E-09                          |
|                  | 300                | 4,9E-09            | 0,0E+00            | 2,4E-09 | 2,4E-09                          |
| h-CTP            | 30                 | 4,5E-09            | 2,2E-08            | 1,3E-08 | 8,7E-09                          |
|                  | 100                | 0,0E+00            | 0,0E+00            | 0,0E+00 | 0,0E+00                          |
|                  | 300                | 1,3E-08            | 5,3E-09            | 9,3E-09 | 4,0E-09                          |
| h-HxTP           | 30                 | 0,0E+00            | 5,0E-09            | 2,5E-09 | 2,5E-09                          |
|                  | 100                | 1,1E-08            | 6,6E-09            | 9,1E-09 | 2,4E-09                          |
|                  | 300                | 1,2E-08            | 5,1E-09            | 8,6E-09 | 3,4E-09                          |
| h-isoGTP         | 30                 | 1,2E-07            |                    |         |                                  |
|                  | 100                | 1,3E-07            |                    |         |                                  |
|                  | 300                | 1,0E-07            |                    |         |                                  |
| h-GTPαmet        | 30                 | 8,2E-08            |                    |         |                                  |
|                  | 100                | 1,5E-07            |                    |         |                                  |
|                  | 300                | 8,7E-08            |                    |         |                                  |
| ce-TTP           | 30                 | 7,1E-09            | 4,4E-09            | 5,7E-09 | 1,3E-09                          |
|                  | 100                | 0,0E+00            | 0,0E+00            | 0,0E+00 | 0,0E+00                          |
|                  | 300                | 2,0E-08            | 1,6E-08            | 1,8E-08 | 2,1E-09                          |
| ce-CTP           | 30                 | 1,5E-08            | 1,4E-08            | 1,5E-08 | 7,8E-10                          |
|                  | 100                | 7,3E-09            | 6,8E-09            | 7,1E-09 | 2,1E-10                          |
|                  | 300                | 0,0E+00            | 0,0E+00            | 0,0E+00 | 0,0E+00                          |
| ce-ATP           | 30                 | 2,3E-08            | 1,8E-08            | 2,1E-08 | 2,6E-09                          |
|                  | 100                | 1,3E-08            | 4,5E-08            | 2,9E-08 | 1,6E-08                          |
|                  | 300                | 3,4E-08            | 5,4E-08            | 4,4E-08 | 9,6E-09                          |
| ce-GTP           | 30                 | 6,2E-08            | 0,0E+00            | 3,1E-08 | 3,1E-08                          |
|                  | 100                | 5,0E-09            | 4,1E-09            | 4,6E-09 | 4,7E-10                          |
|                  | 300                | 0,0E+00            | 0,0E+00            | 0,0E+00 | 0,0E+00                          |
| ara-TTP          | 30                 | 1,5E-08            | 1,5E-08            | 1,5E-08 | 5,5E-10                          |
|                  | 100                | 1,2E-08            | 6,9E-09            | 9,3E-09 | 2,4E-09                          |
|                  | 300                | 1,3E-07            | 3,5E-08            | 8,4E-08 | 4,9E-08                          |
| ara-GTP          | 30                 | 1,9E-08            | 1,4E-08            | 2,0E-08 | 2,1E-10                          |
|                  | 100                | 8,5E-08            | 7,5E-08            | 8,0E-08 | 5,0E-09                          |
|                  | 300                | 9,0E-08            | 6,2E-08            | 7,6E-08 | 1,4E-08                          |
| mo-ATP           | 30                 | 1,0E-07            |                    |         |                                  |
|                  | 100                | 9,3E-08            |                    |         |                                  |
|                  | 300                | 1,6E-08            |                    |         |                                  |
| mo-CTP-N-Benzoyl | 30                 | 8,0E-09            | 4,3E-09            | 6,1E-09 | 1,9E-09                          |

|                       |     |         |         |         |         |
|-----------------------|-----|---------|---------|---------|---------|
|                       | 100 | 6,6E-08 | 4,8E-09 | 3,5E-08 | 3,1E-08 |
|                       | 300 | 6,3E-09 | 1,3E-07 | 7,0E-08 | 6,4E-08 |
| al-CTP                | 30  | 3,3E-09 | 0,0E+00 | 1,7E-09 | 1,7E-09 |
|                       | 100 | 0,0E+00 | 1,0E-08 | 5,2E-09 | 5,2E-09 |
|                       | 300 | 2,7E-08 | 2,2E-08 | 2,4E-08 | 2,3E-09 |
| al-UTP                | 30  | 2,2E-07 |         |         |         |
|                       | 100 | 8,4E-09 |         |         |         |
|                       | 300 | 4,1E-07 |         |         |         |
| al-ATP                | 30  | 1,3E-07 |         |         |         |
|                       | 100 | 1,8E-07 |         |         |         |
|                       | 300 | 6,9E-08 |         |         |         |
| pro-ATP               | 30  | 1,0E-07 |         |         |         |
|                       | 100 | 7,6E-08 |         |         |         |
|                       | 300 | 3,1E-07 |         |         |         |
| 7-deaza-dGTP          | 30  | 4,4E-07 |         |         |         |
|                       | 100 | 1,4E-08 |         |         |         |
|                       | 300 | 1,2E-07 |         |         |         |
| 8-aza-dGTP            | 30  | 9,0E-09 |         |         |         |
|                       | 100 | 6,4E-08 |         |         |         |
|                       | 300 | 8,2E-08 |         |         |         |
| 8-methyl-dGTP         | 30  | 1,0E-07 |         |         |         |
|                       | 100 | 1,6E-08 |         |         |         |
|                       | 300 | 5,6E-07 |         |         |         |
| 7-fluoro-7-deaza-dGTP | 30  | 4,1E-08 |         |         |         |
|                       | 100 | 4,4E-08 |         |         |         |
|                       | 300 | 3,5E-08 |         |         |         |
| 5-methyl-dCTP         | 30  | 6,7E-08 | 5,4E-08 | 6,0E-08 | 6,5E-09 |
|                       | 100 | 7,9E-09 | 0,0E+00 | 3,9E-09 | 3,9E-09 |
|                       | 300 | 0,0E+00 | 0,0E+00 | 0,0E+00 | 0,0E+00 |
| 5-fluoro-dCTP         | 30  | 0,0E+00 | 0,0E+00 | 0,0E+00 | 0,0E+00 |
|                       | 100 | 1,3E-08 | 5,7E-09 | 9,3E-09 | 3,6E-09 |
|                       | 300 | 1,2E-08 | 1,7E-08 | 1,5E-08 | 2,7E-09 |
| 5-bromo-dCTP          | 30  | 8,7E-08 | 0,0E+00 | 4,3E-08 | 1,7E-08 |
|                       | 100 | 0,0E+00 | 1,1E-08 | 5,7E-09 | 5,7E-09 |
|                       | 300 | 0,0E+00 | 7,2E-09 | 3,6E-09 | 4,4E-09 |
| 7-deaza-dATP          | 30  | 2,9E-07 | 1,3E-07 | 2,1E-07 | 8,2E-08 |
|                       | 100 | 6,8E-08 | 4,2E-08 | 5,5E-08 | 1,3E-08 |
|                       | 300 | 1,4E-07 | 1,9E-07 | 1,6E-07 | 2,4E-08 |
| 7-deaza-8aza-dATP     | 30  | 6,5E-09 | 5,2E-09 | 5,8E-09 | 6,7E-10 |

|                   |     |         |         |          |                    |
|-------------------|-----|---------|---------|----------|--------------------|
|                   | 100 | 3,2E-08 | 0,0E+00 | 1,6E-08  | 1,6E-08            |
|                   | 300 | 4,8E-09 | 3,4E-08 | 1,9E-08  | 1,4E-08            |
| 8-aza-dATP        | 30  | 6,9E-09 |         |          |                    |
|                   | 100 | 2,4E-08 |         |          |                    |
|                   | 300 | 1,0E-08 |         |          |                    |
| dZTP              | 30  | 5,3E-07 | 6,7E-07 | 6,0E-07  | 7,4E-08            |
|                   | 100 | 1,2E-06 | 2,2E-06 | 1,7E-06  | 5,1E-07            |
|                   | 300 | 3,1E-06 | 4,4E-06 | 3,8E-06  | 6,5E-07            |
| 5-chloro-dUTP     | 30  | 2,3E-08 | 3,7E-09 | 1,3E-08  | 9,7E-09            |
|                   | 100 | 7,4E-09 | 1,6E-08 | 1,2E-08  | 4,4E-09            |
|                   | 300 | 2,5E-08 | 1,9E-08 | 2,2E-08  | 2,8E-09            |
| 8-aza-8-d-isodGTP | 30  | 0,0E+00 |         |          |                    |
|                   | 100 | 4,8E-08 |         |          |                    |
|                   | 300 | 0,0E+00 |         |          |                    |
| 8-OH-dHxTP        | 30  | 3,5E-07 | 5,6E-08 | 2,0E-07  | 1,5E-07            |
|                   | 100 | 8,4E-07 | 3,4E-07 | 5,9E-07  | 2,5E-07            |
|                   | 300 | 2,0E-06 | 9,7E-07 | 1,5E-06  | 5,1E-07            |
|                   |     |         |         |          | Standard deviation |
| no triP           |     |         |         | 2,5E-08  | 2,3E-08            |
| 5-aza-dCTP        |     |         |         | 3,80E-06 | 2,80E-06           |

## References

- 1 K. Vastmans, S. Pochet, A. Peys, L. Kerremans, A. Van Aerschot, C. Hendrix, P. Marlière and P. Herdewijn, *Biochemistry*, 2000, 39, 12757–12765.
- 2 K. Vastmans, M. Froeyen, L. Kerremans, S. Pochet, P. Herdewijn, *Nucleic Acids Research*, 2001, 29, 3154–3163.
- 3 J. Attwater, S. Tagami, M. Kimoto, K. Butler, E. T. Kool, J. Wengel, P. Herdewijn, I. Hirao and P. Holliger, *Chem. Sci.*, 2013, 4, 2804.
- 4 V. Kempeneers, M. Renders, M. Froeyen, P. Herdewijn, *Nucleic Acids Research*, 2005, 33, 3828–3836.
- 5 P. Gu, J. Morral, J. Wang, J. Rozenski, R. Busson, A. Van Aerschot, E. De Clercq and P. Herdewijn, *Antivir Chem Chemother*, 2003, 14, 31–37.
- 6 C. L. Moore, M. Chiaramonte, T. Higgins and R. D. Kuchta, *Biochemistry*, 2002, 41, 14066–14075.
- 7 T. V. Abramova, P. A. Bakharev, S. V. Vasilyeva and V. N. Silnikov, *Tetrahedron Letters*, 2004, 45, 4361–4364.
- 8 H. Mutschler, A. I. Taylor, B. T. Porebski, A. Lightowlers, G. Houlihan, M. Abramov, P. Herdewijn and P. Holliger, *eLife*, 2018, 7, e43022.
- 9 E. Eremeeva, M. Abramov, L. Margamuljana, J. Rozenski, V. Pezo, P. Marlière and P. Herdewijn, *Angew. Chem. Int. Ed.*, 2016, 55, 7515–7519.
- 10 E. Eremeeva, M. Abramov, L. Margamuljana and P. Herdewijn, *Chem. Eur. J.*, 2017, 23, 9560–9576.

- 11 H. Kamiya, H. Yakushiji, L. Dugué, M. Tanimoto, S. Pochet, Y. Nakabeppu and H. Harashima, *Journal of Molecular Biology*, 2004, 336, 843–850.
- 12 J. Ludwig, *Acta Biochim Biophys Acad Sci Hung*, 1981, 16, 131–133.
- 13 V. Pezo, F. Jaziri, P.-Y. Bourguignon, D. Louis, D. Jacobs-Sera, J. Rozenski, S. Pochet, P. Herdewijn, G. F. Hatfull, P.-A. Kaminski and P. Marliere, *Science*, 2021, 372, 520–524.
- 14 I. Verheggen, A. Van Aerschot, L. Van Meervelt, J. Rozenski, L. Wiebe, R. Snoeck, G. Andrei, J. Balzarini, P. Claes, P. Herdewijn, *J. Med. Chem.*, 1995, 38, 826–835.
- 15 G. Ceulemans, A. Van Aerschot, B. Wroblowski, J. Rozenski, C. Hendrix and P. Herdewijn, *Chem. Eur. J.*, 1997, 3, 1997–2010.
- 16 V. Pezo, C. Hassan, D. Louis, B. Sargueil, P. Herdewijn and P. Marlière, *ACS Synth. Biol.*, 2018, 7, 1565–1572.
